1 ***In Vitro* efficacy comparison of linezolid, tedizolid, sutezolid and delpazolid**  
2 **against rapid growing Mycobacteria isolated in Beijing, China**

3

4 Shuan Wen<sup>1§</sup>, Xiaopan Gao<sup>2§</sup>, Weijie Zhao<sup>3§</sup>, Fengmin Huo<sup>1</sup>, Guanglu Jiang<sup>1</sup>, Lingling Dong<sup>1</sup>,  
5 Liping Zhao<sup>1</sup>, Fen Wang<sup>1</sup>, Xia Yu<sup>1\*</sup>, Hairong Huang<sup>1\*</sup>.

6 1 National Clinical Laboratory on Tuberculosis, Beijing Key laboratory for Drug-resistant  
7 Tuberculosis Research, Beijing Chest Hospital, Capital Medical University, Beijing, China;

8 2MOH Key Laboratory of Systems Biology of Pathogens, Institute of Pathogen Biology, Chinese  
9 Academy of Medical Sciences & Peking Union Medical College, Beijing, China.

10 3 The administration office of clinical trial, Beijing Chest Hospital, Capital Medical University,  
11 Beijing, China

12

13

14 §These authors contributed equally to this study. Author order was determined by working load.

15

16

17

18 \*Correspondence should be addressed to Dr. Huang at [huanghairong@tb123.org](mailto:huanghairong@tb123.org) or Dr. Yu at  
19 [yuxiasmart@163.com](mailto:yuxiasmart@163.com), BeiguanSt, No. 9, Tongzhou Qu, Beijing 101149, China.

20

21

22 **Running title:** The efficacy of oxazolidinones against RGM

23

24 **ABSTRACT**

25 The natural resistance of rapid growth Mycobacterium (RGM) against multiple  
26 antibiotics renders the treatment of caused infections less successful and time  
27 consuming. Therefore, new effective agents are urgently needed. The aim of this  
28 study was to evaluate the *in vitro* susceptibility of 115 isolates, constituting different  
29 RGM species, against four oxazolidinones i.e.delpazolid,sutezolid,tedizolid and  
30 linezolid.Additionally,32 reference strains of different RGM species were also  
31 tested.The four oxazolidinones exhibited potent *in vitro* activity against the recruited  
32 RGM reference strains,24 out of 32 RGM species had MICs $\leq$ 8 $\mu$ g/mL against all four  
33 oxazolidinones whereas tedizolid and delpazolid generally presented lower MICs than  
34 linezolid or sutezolid. Tedizolid showed the strongest activity against clinical isolates  
35 of *M.abscessus* with MIC<sub>50</sub>=1 $\mu$ g/mL and MIC<sub>90</sub>=2 $\mu$ g/mL.MIC values for tedizolid  
36 were usually 4- to 8-fold less than the MICs of linezolid for *M.abscessus* subsp.  
37 *abscessus*.The MIC distributions of sutezolid and linezolid were similar, while  
38 delpazolid showed 2-fold lower MIC as compared with linezolid.Linezolid was not  
39 active against most of the tested *M.fortuitum* isolates, 22 out of the 25 *M.fortuitum*  
40 were resistant against linezolid. However,delpazolid exhibited better antimicrobial  
41 activity against these isolates with 4-fold lower MIC values,in contrast with  
42 linezolid.In addition,the protein alignment of RplC and RplD and structure based  
43 analysis showed that there may be no correlation between oxazolidinones resistance  
44 and mutations *in rplC,rplD* and *23srRNA*genes in tested RGM.This study showed  
45 tedizolid harbors the strongest inhibitory activity against *M.abscessus in vitro*,while  
46 delpazolid presented the best activity against *M.fortuitum*,which provided important  
47 insights on the potential clinical application of oxazolidinones to treat RGM  
48 infections.

49 **KEYWORDS:** Rapidgrowing Mycobacteria, delpazolid, sutezolid, tedizolid,  
50 linezolid, antimicrobial activity

51

52

53

## 54 INTRODUCTION

55 Non-tuberculous mycobacteria (NTM) are recognized as important opportunistic  
56 pathogens of humans that can cause pulmonary infection, lymphadenitis, skin  
57 abscesses, disseminated infection and systematic infection. The prevalence of NTM  
58 infections has increased globally and even surpassed tuberculosis (TB) in certain  
59 countries (1-5). According to their speed of growth (i.e. appearance of visible colonies  
60 within or after 7 day cultivation on solid medium), NTM can be categorized as rapid  
61 growing Mycobacteria (RGM) or slow growing mycobacteria (SGM). Compared with  
62 SGM, RGM are more resistant to conventional anti-TB agents and other general  
63 antibiotics, therefore, increasing the chances of treatment failure(6). *M.abscessus* and  
64 *M.fortuitum* are among the most frequently isolated and pathogenic RGMs(1-5).  
65 *M.abscessus* often cause severe pulmonary infections with poor clinical outcomes and  
66 have been frequently reported to cause soft tissue infections(7). *M.fortuitum* can cause  
67 soft tissue infection during trauma and surgery, while lung disease caused by them is  
68 rare(8). The limited efficacies and availability of only fewer choices of medications  
69 highlight the requirement of identifying new and more potent antimicrobials against  
70 RGMs.

71 Oxazolidinones have demonstrated promising efficacies against *M.tuberculosis*  
72 (TB) *in vitro* and *in vivo*. Due to their distinct mechanism of action (binding to the  
73 23S ribosome, thereby blocking microbial protein synthesis) without cross-resistance  
74 to the existing TB drugs. Oxazolidinones are proposed to be used for the treatment of  
75 multiple drug resistant TB. Linezolid (LZD), licensed in 2000, is an oxazolidinone  
76 which exhibited excellent antibacterial activity against drug resistant tuberculosis  
77 (DR-TB) and NTM infection(9-12). However, serious hematologic and neurologic  
78 toxicities can be caused by LZD during long term therapy due to its inhibition of  
79 mitochondrial protein synthesis which often requires dose reduction or  
80 discontinuation(13). Thus, new oxazolidinones drugs with superior efficacy and  
81 reduced toxicity are continuously sought.

82 Recently, three new next-generation oxazolidinones have been developed for  
83 potential use against DR-TB. Tedizolid (TZD) phosphate is a novel, potent

84 oxazolidinone pro-drug that has been approved by the American FDA (2014) and the  
85 European Medicine Agency (2015) for treatment of acute bacterial skin and soft tissue  
86 infections(7). The pharmacokinetic/pharmacodynamics properties of TZD allow it to  
87 be administered orally once daily, facilitating its usage in prolonged treatment course.  
88 Sutezolid (SZD) (PNU-100480) is a thiomorpholinyl analog of LZD with preliminary  
89 evidence of superior efficacy against *M. tuberculosis*(14). SZD was found to be  
90 generally safe, well tolerated in TB patients, and with readily detectable bactericidal  
91 activity in sputum and blood. Delpazolid (LCB01-0371)(DZD) is a thiomorpholinyl  
92 analog of LZD, which showed superior efficacy against *M.tuberculosis* in the  
93 hollow-fiber, mouse model, and whole-blood model (2–4). DZD was well tolerated  
94 and showed bacteriostatic and bactericidal activity comparable to LZD against *S.*  
95 *aureus*, *E. faecalis* and methicillin-resistant *Staphylococcus aureus* in a recently  
96 completed phase I clinical trial(15).

97 To better understand the efficacies of these three new-generation oxazolidinones  
98 against different RGM species, we detected the MICs of 32 RGM reference strains  
99 and 115 RGM clinical isolates collected in Beijing, China. Furthermore, we  
100 investigated the three reported LZD-resistance genes (including *rplC*, *rplD* and  
101 *23srRNA*) from different RGM species to identify their potential relationships with  
102 oxazolidinone resistance.

## 103 **RESULTS**

### 104 ***MICs of SZD,TZD,DZD and LZD against RGM reference strains***

105 The MICs of the 32 reference strains against SZD, TZD, DZD and LZD are  
106 presented in Table 1. All four oxazolidinones exhibited antimicrobial activities *in vitro*  
107 against the recruited RGM reference stains. Majority of the species had MICs equal to  
108 or below 8 $\mu$ g/mL for all four drugs. Only *M.fortuitum* and *M.rhodesiae* had MICs  
109 greater than 32 $\mu$ g/mL. Generally, a given isolate presented uniform tendency against  
110 all four oxazolidinones, the MIC values were either high for or low for the four drugs.  
111 For *M.abscessus*, the efficacy of TZD was stronger than LZD.

### 112 ***The MIC distributions of M.abscessus and M.massiliense against LZD,TZD,SZD and*** 113 ***DZD***

114 The MIC distributions of *M.abscessus* and *M.massiliense* against LZD, TZD,

115 SZD and DZD are shown in Figure 1. MICs for TZD were generally 4- to 8-fold less  
116 than the MICs of LZD for the two species. The MIC distribution of SZD was similar  
117 to LZD, while DZD values were generally half of LZD. Notably, TZD showed  
118 strongest activity against *M.abscessus* with MIC<sub>50</sub>=1µg/mL and MIC<sub>90</sub>=2µg/mL.  
119 According to the CLSI resistance criteria for LZD(16), the susceptibility rate of  
120 *M.abscessus* against LZD, TZD, SZD and DZD was 73.5%(36/49), 100%(49/49),  
121 71.4%(35/49), 87.8%(43/49), respectively. The susceptibility rate of *M.massiliense*  
122 against LZD, TZD, SZD and DZD was 65.8%(23/35), 82.9%(29/35), 68.6%(24/35)  
123 and 74.3%(26/35), respectively. In general, the MIC distributions of *M.massiliense*  
124 had uniform tendency than *M.abscessus*, but with an exception for TZD. The MICs of  
125 *M.massiliense* isolates were higher than *M.abscessus*. 6 out of 35 isolates of  
126 *M.massiliense* had MICs  $\geq 16\mu\text{g/mL}$  against TZD, the MICs of all the tested  
127 *M.abscessus* were  $\leq 4\mu\text{g/mL}$ . In addition, the MIC outcomes for species with less  
128 than five isolates are presented in Table 2.

#### 129 **The MIC distributions of *M.fortuitum* against LZD, TZD, SZD and DZD**

130 The MIC distributions of *M.fortuitum* against LZD, TZD, SZD and DZD are  
131 shown in Figure 2. In contrast to *M.abscessus* and *M.massiliense*, *M.fortuitum*  
132 presented higher percentage of resistance against the four oxazolidinones. The  
133 susceptibility profiles of the clinical isolates exhibited much lower MICs than  
134 *M.fortuitum* ATCC6481 reference strain. In Total, 88%(22/25) of the clinical isolates  
135 were resistant to LZD, including *M.fortuitum* reference strain. The *in vitro* activity of  
136 DZD was relatively better than LZD as indicated by its 2- to 4-fold lower MIC. The  
137 MIC distributions of TZD was similar to LZD as only 5 out of 25 isolates indicated  
138 MIC  $\leq 8\mu\text{g/mL}$ . According to the cutoff value of LZD, the susceptibility rates of  
139 *M.fortuitum* against TZD, SZD and DZD were 20%(5/25), 12%(3/25), 76%(19/25),  
140 respectively.

#### 141 **Alternations in the Oxazolidinones target sites**

142 The entire *23SrRNA*, *rplC*, and *rplD* genes were sequenced to identify the  
143 potential mutations associated with oxazolidinones resistance. The sequences of the  
144 tested clinical isolates of *M.abscessus*, *M.massiliense* and *M.fortuitum* were compared

145 with their corresponding reference strains. For *M.massiliense* isolates, Ala177Proin  
146 *rplD* was detected in 12 isolates with MIC of LZD  $\geq 2 \mu\text{g/mL}$ . In addition, two types  
147 of synonymous SNPs within the coding region of *rplC* were also observed both in  
148 LZD resistant and susceptible isolates, including Leu86Leu(CTG  $\rightarrow$  CTT) and  
149 Ala92Ala(GCG $\rightarrow$ GCT). A2271G in 23SrRNA was found in one isolate with MIC of  
150 LZD=8  $\mu\text{g/mL}$ . For *M.abscessus* isolates, no non-synonymous mutation in the coding  
151 gene of *rplC* and *rplD* was observed, while most frequently observed mutation i.e.  
152 T2650C(n=2) was found in 23SrRNA with MIC of LZD  $\geq 2 \mu\text{g/mL}$ (Table 3).

153 Among the tested *M.fortuitum* isolates, all MICs for LZD were above 2  $\mu\text{g/mL}$ .  
154 No non-synonymous mutation was detected in the *rplC* gene. Among 25 tested  
155 *M.fortuitum* isolates, A2090T and C1944T in 23SrRNA were detected in two isolates  
156 with MIC=32  $\mu\text{g/mL}$  and 8 $\mu\text{g/mL}$  for LZD, respectively. In addition, 21 out of 25  
157 clinical *M.fortuitum* isolates simultaneously showed following nine non-synonymous  
158 mutations in the coding protein of *rplD* for the both LZD susceptible and resistant  
159 isolates: Ala146Gly(GCG $\rightarrow$ GGC), Thr147Ser(ACC $\rightarrow$ AGC), Val156Ile(GTG $\rightarrow$ ATC),  
160 Ala161Thr(GCG  $\rightarrow$  ACC), Lys167Arg(AAG  $\rightarrow$  CGC), Ser207Ala(TCC  $\rightarrow$  GCG),  
161 Glu212Gly(GAG $\rightarrow$ GGA), Val213Ala(GTG $\rightarrow$ GCG), Ala215Val(GCC $\rightarrow$ GTC) (Table  
162 4).

### 163 ***Structural mapping of clinical mutants***

164 For *M.massiliense* isolates, Ala177Pro in RplD was detected in 12 isolates, both  
165 in LZD susceptible and resistant isolates with MIC $\geq 2 \mu\text{g/mL}$ . To gain an insight  
166 into the functional relevance of RplC and RplD mutation, multiple sequences  
167 alignment of RplC and RplD homologues from different mycobacterial species were  
168 performed (Figure S1 and S2). The protein sequence of RplC and RplD in different  
169 mycobacterial species are highly conserved. In addition, we used *M. tuberculosis*  
170 RplD structure as a model to map *M.massiliense* RplD mutation(PDB ID:5V7Q)  
171 (Figure 5B). The structure shows that Ala177 is located in a high variable region  
172 between  $\beta 3$  and  $\eta 2$  and is far from the LZD binding site which indicates that this  
173 mutation may not be related to LZD resistance(Figure 3B). Next, we mapped the  
174 23SrRNA functional mutations of *M.abscessus*, *M.massiliense* and *M.fortuitum*. The

175 results showed that except A2271 in *M.massiliense*, the other mutations including  
176 G2582, A2625 and T2650 were far from the catalytic center (Figure 3C).

## 177 DISCUSSION

178 The treatment of RGM infection is often very difficult because of their higher  
179 drug resistance rate than SGM and unavailability of highly potent drugs against them  
180 *in vitro*. *M.abscessus* complex and *M.fortuitum* are two most prevalent RGM species  
181 around the world. Infections due to *M.abscessus* carry a poor prognosis since this  
182 RGM is, for all the correct reasons, considered an “antibiotic nightmare”(17). Thus,  
183 identifying drugs that could work potently against *M.abscessus* is a priority.  
184 *M.massiliense* is a species that originally split from *M.abscessus* but they are located  
185 closely in the phylogenetic tree(18). The treatment response rates to  
186 clarithromycin-based antibiotic therapy are much higher in patients with  
187 *M.massiliense* than patients with *M.abscessus* lung disease(19). *M.fortuitum* is the  
188 main RGM responsible for extra-pulmonary disease, especially in cutaneous and  
189 plastic surgery-related infections(20). In contrast to *M.abscessus*, *M.fortuitum*  
190 infection has better prognosis due to some available effective drugs(21). However, its  
191 emerging drug resistance highlights the need for new and effective drugs(21-23).  
192 Several studies have verified the efficacy of LZD in MDR-TB or even in XDR-TB  
193 treatment (9, 13, 24). A few studies also proved its antibacterial activity against NTM  
194 species either *in vitro* or *in vivo*(25, 26). As a novel oxazolidinone prodrug, TZD  
195 exhibited greater potency than LZD against *M. tuberculosis*(6, 27) as well as against  
196 NTM(28, 29). Limited studies or no study has been performed to evaluate the efficacy  
197 of SZD and DZD against NTM species(28), whereas only a few studies provided  
198 preliminary assessment of their potential usage in TB(14, 30, 31). In this study, we  
199 evaluated the efficacies of four oxazolidinones against the reference and clinical  
200 isolates of RGM to gain insights on their potential use for specific RGM species.

201 As new drugs, well recognized susceptibility testing methods for TZD, SZD and  
202 DTD have not been developed and the breakpoints to define drug resistance for them  
203 have never been discussed yet. Therefore, the MIC data of different RGM species  
204 against oxazolidinones still remain scarce. In this study, the four oxazolidinones

205 exhibited promising activities *in vitro* against the recruited RGM reference stains. The  
206 absolute majority of species had MICs below 8µg/mL against the four drugs. However,  
207 different species presented non-uniform susceptibility patterns. The MIC distributions  
208 of *M.massiliense* had similar tendency to the *M.abscessus*, but the MICs of TZD were  
209 obviously higher than *M.abscessus*. In comparison with other oxazolidinones, the  
210 MIC values for TZD were the lowest for both *M.abscessus* and *M.massiliense*.  
211 Previous studies, including 170 isolates of RGM, showed equivalent or lower (1 to 8  
212 fold) MIC<sub>50</sub> and MIC<sub>90</sub> values for TZD in contrast with LZD(29). Furthermore, TZD  
213 harbors several advantages over LZD in terms of tolerability, safety, dosing frequency,  
214 and treatment duration(32). Only a few studies have reported the clinical use of TZD  
215 for the treatment of NTM infections. Our results indicated that its usage seems  
216 reasonable for the treatment of infection caused by *M.abscessus* and *M.massiliense*.  
217 Among the 25 tested *M.fortuitum* isolates in our study, 22(22/25) strains had MICs of  
218 LZD at  $\geq 16$  mg/L. Based on the CLSI criteria, these strains could be categorized as  
219 intermediate resistant or resistant strains, 52% (13/25) of them belong to resistant  
220 strains. Using the cutoff value of LZD as the tentative breakpoints, the susceptibility  
221 rate of *M.fortuitum* against TZD, SZD and DZD were 20%(5/25), 12%(3/25),  
222 76%(19/25), respectively. DZD exhibited the best antimicrobial activity against the  
223 *M.fortuitum*. However, whether this *in vitro* outcome reflects the *in vivo* efficacy or  
224 not, requires further investigation.

225 A major limitation of this study was that no recommended breakpoint of different  
226 NTM species against TZD, SZD or DZD had been proposed previously. Beside *in*  
227 *vitro* MIC distributions, the breakpoint determination also correlates with clinical  
228 treatment response and pharmacokinetic/pharmacodynamics (PK/PD) data including  
229 drug dose. The clinical trial on these new oxazolidinones are either unavailable or  
230 very limited. A few studies have been performed on the pharmacokinetic analysis of  
231 these drugs. Generally, all the drugs were well-tolerated, and the C<sub>max</sub> were highly  
232 dose-dependent. Recently, Choi et al demonstrated that, after multiple doses of TZD  
233 up to 1200mg twice daily for 21days,the peak serum concentration was 16.3µg/mL,  
234 which is comparable with peak serum concentrations of LZD=12.5µg/mL at the



235 dosage of 300mg twice daily(15, 33). In another study, a single 800mg dose of DZD  
236 under fasting condition acquired  $C_{max}$  at 11.74 $\mu$ g/mL(34). STD presented superior  
237 efficacy than LZD against experimental murine model of tuberculosis. The  $C_{max}$  of its  
238 major metabolite PNU-101603, which contributes to its activity, was 6.46 $\mu$ g/mL at  
239 given dose of 1200mg QD (40). However, since the optimal dosage of these  
240 next-generation oxazolidinones is still under investigation, the appropriate  
241 breakpoints for the susceptibility definition of these drugs remain beyond known.

242 LZD works by binding to the peptidyl transferase center of the 50S ribosomal  
243 subunit, which is composed of 5S and 23S rRNAs and 36 riboproteins (L1 through  
244 L36)(35). Recently, the Cryo-EM structure of the large ribosomal subunit from  
245 *M.tuberculosis* bound with a potent LZD analog (LZD-114) was determined(36).  
246 LZD-114 is similar with LZD in C ring but different in A and B ring that lacks a  
247 fluorine group in the B-ring while the original morpholine ring is replaced by a  
248 thiazole ring in the A-ring(Figure 3A). The LZD-114 also was bound in the same  
249 pocket and in a similar orientation to LZD in other species(37, 38). The structure  
250 showed that *rplC* encoded ribosomal protein L3 and *rplD* encoded ribosomal protein  
251 L4 bind directly to 23S ribosomal RNA and was placed relatively close to the LZD  
252 binding site on the ribosomes, suggesting that the mechanism for reduced  
253 susceptibility may include structural perturbation of the LZD binding site  
254 (PDB:5V7Q). Furthermore, previous studies demonstrated that mutations in *rplC* and  
255 *rplD* could lead to LZD resistance in *M.tuberculosis*(12, 39). However, there is no  
256 non-synonymous mutation in *rplC* against the tested RGM. Ala77Pro mutation was  
257 detected in *rplD* which is located in variable site and is far away from LZD-binding  
258 site, as shown by the sequence alignment. Except A2271G mutation in 23SrRNA in  
259 *M.massiliense* that was closer to binding site of LZD, other mutations are far from the  
260 LZD-binding site. Our results combining MIC test, gene mutation and structure based  
261 analysis showed there is no obvious correlation between riboproteins mutations (*rplC*  
262 and *rplD*) and LZD resistance identified in this study in the RGM species. Mutations  
263 located in the LZD binding site may cause LZD resistant. Hence, *rplC*, *rplD* and  
264 *23srRNA* homologues might not be the only target for LZD to explore its

265 bacteriostatic activity.

266 In conclusion, this study demonstrated that oxazolidinones have good *in vitro*  
267 activities against the overwhelming majority of RGM species. The efficacies of the  
268 four oxazolidinones were variable against different species. TZD showed strongest  
269 antimicrobial activity against *M.abscessus* and *M.massiliense*, while DZD owned the  
270 strongest activity against *M.fortuitum*. The data provided important insights on the  
271 possible clinical applications of oxazolidinones to treat RGM infections.

## 272 MATERIAL AND METHODS

### 273 *Ethics statement*

274 As the study only concerned laboratory testing of mycobacteria without the  
275 direct involvement of human subjects, ethics approval was not sought.

### 276 *Reference strains and clinical isolates*

277 The mycobacterial reference strains stored in the Bio-bank in Beijing Chest  
278 Hospital (Beijing, China) were tested against LZD, TZD, SZD and DZD *in vitro*,  
279 including 32 RGM species. These reference strains were obtained either from the  
280 American Type Culture Collection (ATCC) or from the German Collection of  
281 Microorganisms (DSM). The species constitution of these reference strains are listed  
282 in Table 1. *M.massiliense* reference strain was not included due to its absence in our  
283 stock. One-hundred fifteen isolates of RGM were recruited in Beijing chest hospital  
284 from 2016 to 2018 that included 49 *M.abscessus*, 35 *M.massiliense*, 25 *M.fortuitum*.  
285 The species constitution of the remaining 6 isolates is presented in Table 2.

286 All of the 115 RGM clinical strains were isolated from tuberculosis suspected  
287 patients. The strains were classified as RGM preliminarily with p-nitrobenzoic acid  
288 containing medium, and then were identified by gene sequencing as indicated for each  
289 species by *16S rRNA*, *hsp65*, *rpoB*, *16-23S rRNA* internal transcribed spacer  
290 sequencing (40). All the isolates were stored at -80°C and sub-cultured on LJ medium  
291 before performing drug susceptibility test.

### 292 *Minimal inhibitory concentration (MIC) testing*

293 TZD phosphate and LZD were purchased from Toronto Research Chemicals and  
294 Sigma-aldrich, respectively. SZD and DZD were purchased from Shanghai  
295 Biochempartner Co., Ltd (Shanghai, China) and JHK BioPharma, respectively.  
296 Oxazolidinones were dissolved in dimethyl sulfoxide (DMSO). Stock solutions were  
297 aseptically prepared at concentrations of 2.56 mg/mL. Broth microdilution method  
298 was performed according to the guidelines of Clinical and Laboratory Standards  
299 Institute (CLSI)(41). Cation-adjusted Mueller-Hinton broth (CAMHB) was used for  
300 MIC test. The inoculum was prepared with fresh culture grown on Lowenstein-Jensen  
301 medium. The broth microdilution format was set up as 2-fold dilution, the  
302 concentrations of all the tested drugs ranged from 0.063 $\mu$ g/mL to 32 $\mu$ g/mL. Briefly, a  
303 bacterial suspension of 0.5 McFarland standard was prepared, and then diluted and  
304 inoculated into 96-well microtiter plate to achieve final bacterial load at 10<sup>5</sup> colony  
305 forming unit (CFU) per well. Plates were then incubated at 37°C for 3 days for RGM.  
306 70 $\mu$ L solution containing 20 $\mu$ L AlamarBlue (Bio-rad) and 50 $\mu$ L Tween80 (5%) was  
307 added to each well and incubated for 24 h at 37 °C before assessing color  
308 development. A change from blue to pink or purple indicated bacterial growth (42).  
309 The MIC was defined as the lowest concentration of antibiotic that prevented a color  
310 change from blue to pink.

311 The breakpoint of LZD was adopted from the CLSI document M24-A2  
312 (susceptible: $\leq$ 8 mg/L; intermediate resistant: 16 mg/L; resistant: $\geq$ 32 mg/L) (16).  
313 Since no well-recognized breakpoint has been proposed for TZD, SZD or DZD, a  
314 preliminary data analysis was performed for them referring the breakpoint of LZD.

### 315 ***Mutations conferring oxazolidinones resistance and protein Alignment***

316 Sequencing of PCR products was performed using the Sanger method with  
317 primers designed to be specific for *rplC*, *rplD* and *23S rRNA*. We used previously  
318 described primers for *23S rRNA*(43), and design new primers for *rplC*, *rplD*  
319 sequencing. The primers used in this study are listed in Table S1 in the supplemental  
320 material and were synthesized by Tsingke Biotech Co. (Beijing, China). The *rplC* and  
321 *rplD* gene of the reference strains of three RGM species plus *M.tuberculosis* were also  
322 sequenced, mutation was defined in contrast with the sequences of the reference

323 strains. The sequences of *M.massiliense* were adopted from website for alignment.  
324 The amplification products were sequenced by Tsingke Company (Beijing, China).  
325 Multiple sequence alignment of the homologous proteins was performed using the  
326 Clustal Omega software. Structure-based multiple sequence alignment was performed  
327 with ESPript 3 based on the crystal structure of RplC and RplD protein of  
328 *M.tuberculosis* from the following URL:<http://espript.ibcp.fr/ESPript/ESPript/>.  
329 **Quality control.** The MIC for quality control strains was determined using each lot of  
330 the prepared microtiter plates, and the results for LZD were within the expected  
331 range.

332

### 333 ACKNOWLEDGEMENT

334 This study was supported by research funding from the Infectious Diseases  
335 Special Project, Ministry of Health of China (2018ZX10302302-004-005,  
336 2018ZX10201301302-004.) the Natural Science Fund of China (81672065 ,  
337 81802057), Beijing Municipal Administration of Hospitals Clinical Medicine  
338 Development of Special Funding Support (ZYLX201824) and Beijing Municipal  
339 Administration of Hospitals' Ascent Plan (DFL20181602).

340

### 341 TRANSPARENCY DECLARATIONS

342 None to declare.

343

- 344 1. Cowman S, van Ingen J, Griffith DE, Loebinger MR. 2019. Non-tuberculous mycobacterial  
345 pulmonary disease. *Eur Respir J* 54.
- 346 2. Santin M, Barrabeig I, Malchair P, Gonzalez-Luquero L, Benitez MA, Sabria J, Palau-Benavent  
347 M, Canete C, Lloret-Queralto JA, Grijota-Camino MD, Dorca J, Alcaide F. 2018. Pulmonary  
348 Infections with Nontuberculous Mycobacteria, Catalonia, Spain, 1994-2014. *Emerg Infect Dis*  
349 24:1091-1094.
- 350 3. Lin C, Russell C, Soll B, Chow D, Bamrah S, Brostrom R, Kim W, Scott J, Bankowski MJ. 2018.  
351 Increasing Prevalence of Nontuberculous Mycobacteria in Respiratory Specimens from  
352 US-Affiliated Pacific Island Jurisdictions(1). *Emerg Infect Dis* 24:485-491.
- 353 4. Brode SK, Marchand-Austin A, Jamieson FB, Marras TK. 2017. Pulmonary versus  
354 Nonpulmonary Nontuberculous Mycobacteria, Ontario, Canada. *Emerg Infect Dis*  
355 23:1898-1901.
- 356 5. Yu X, Liu P, Liu G, Zhao L, Hu Y, Wei G, Luo J, Huang H. 2016. The prevalence of  
357 non-tuberculous mycobacterial infections in mainland China: Systematic review and

- 358 meta-analysis. *J Infect* 73:558-567.
- 359 6. Ruiz P, Causse M, Vaquero M, Casal M. 2019. In Vitro Activity of Tedizolid against  
360 *Mycobacterium tuberculosis*. *Antimicrob Agents Chemother* 63.
- 361 7. Compain F, Soroka D, Heym B, Gaillard JL, Herrmann JL, Dorchene D, Arthur M, Dubee V. 2018.  
362 In vitro activity of tedizolid against the *Mycobacterium abscessus* complex. *Diagn Microbiol*  
363 *Infect Dis* 90:186-189.
- 364 8. Celdran A, Esteban J, Manas J, Granizo JJ. 2007. Wound infections due to *Mycobacterium*  
365 *fortuitum* after polypropylene mesh inguinal hernia repair. *J Hosp Infect* 66:374-7.
- 366 9. Singh B, Cocker D, Ryan H, Sloan DJ. 2019. Linezolid for drug-resistant pulmonary tuberculosis.  
367 *Cochrane Database Syst Rev* 3:CD012836.
- 368 10. Bilgin H, Tukenmez-Tigen E. 2019. Linezolid for drug-susceptible tuberculosis. *Lancet Infect*  
369 *Dis* 19:357.
- 370 11. Bolhuis MS, Akkerman OW, Sturkenboom MGG, Ghimire S, Srivastava S, Gumbo T, Alffenaar  
371 JC. 2018. Linezolid-based Regimens for Multidrug-resistant Tuberculosis (TB): A Systematic  
372 Review to Establish or Revise the Current Recommended Dose for TB Treatment. *Clin Infect*  
373 *Dis* 67:S327-S335.
- 374 12. Zong Z, Jing W, Shi J, Wen S, Zhang T, Huo F, Shang Y, Liang Q, Huang H, Pang Y. 2018.  
375 Comparison of In Vitro Activity and MIC Distributions between the Novel Oxazolidinone  
376 Delpazolid and Linezolid against Multidrug-Resistant and Extensively Drug-Resistant  
377 *Mycobacterium tuberculosis* in China. *Antimicrob Agents Chemother* 62.
- 378 13. Lee M, Lee J, Carroll MW, Choi H, Min S, Song T, Via LE, Goldfeder LC, Kang E, Jin B, Park H,  
379 Kwak H, Kim H, Jeon HS, Jeong I, Joh JS, Chen RY, Olivier KN, Shaw PA, Follmann D, Song SD,  
380 Lee JK, Lee D, Kim CT, Dartois V, Park SK, Cho SN, Barry CE, 3rd. 2012. Linezolid for treatment  
381 of chronic extensively drug-resistant tuberculosis. *N Engl J Med* 367:1508-18.
- 382 14. Wallis RS, Dawson R, Friedrich SO, Venter A, Paige D, Zhu T, Silvia A, Gobey J, Ellery C, Zhang Y,  
383 Eisenach K, Miller P, Diacon AH. 2014. Mycobactericidal activity of sutezolid (PNU-100480) in  
384 sputum (EBA) and blood (WBA) of patients with pulmonary tuberculosis. *PLoS One* 9:e94462.
- 385 15. Cho YS, Lim HS, Lee SH, Cho YL, Nam HS, Bae KS. 2018. Pharmacokinetics, Pharmacodynamics,  
386 and Tolerability of Single-Dose Oral LCB01-0371, a Novel Oxazolidinone with Broad-Spectrum  
387 Activity, in Healthy Volunteers. *Antimicrob Agents Chemother* 62.
- 388 16. Clinical and Laboratory Standards Institute. 2011. Susceptibility testing of mycobacteria,  
389 nocardiae, and other aerobic actinomycetes; approved standard, 2nd ed. CLSI document  
390 M24-A2., Wayne, PA.
- 391 17. Nessar R, Cambau E, Reytrat JM, Murray A, Gicquel B. 2012. *Mycobacterium abscessus*: a new  
392 antibiotic nightmare. *J Antimicrob Chemother* 67:810-8.
- 393 18. Adekambi T, Reynaud-Gaubert M, Greub G, Gevaudan MJ, La Scola B, Raoult D, Drancourt M.  
394 2004. Amoebal coculture of "*Mycobacterium massiliense*" sp. nov. from the sputum of a  
395 patient with hemoptoic pneumonia. *J Clin Microbiol* 42:5493-501.
- 396 19. Koh WJ, Jeon K, Lee NY, Kim BJ, Kook YH, Lee SH, Park YK, Kim CK, Shin SJ, Huitt GA, Daley CL,  
397 Kwon OJ. 2011. Clinical significance of differentiation of *Mycobacterium massiliense* from  
398 *Mycobacterium abscessus*. *Am J Respir Crit Care Med* 183:405-10.
- 399 20. Brown-Elliott BA, Wallace RJ, Jr. 2002. Clinical and taxonomic status of pathogenic  
400 nonpigmented or late-pigmenting rapidly growing mycobacteria. *Clin Microbiol Rev*  
401 15:716-46.

- 402 21. Shen Y, Wang X, Jin J, Wu J, Zhang X, Chen J, Zhang W. 2018. In Vitro Susceptibility of  
403 Mycobacterium abscessus and Mycobacterium fortuitum Isolates to 30 Antibiotics. Biomed  
404 Res Int 2018:4902941.
- 405 22. Aono A, Morimoto K, Chikamatsu K, Yamada H, Igarashi Y, Murase Y, Takaki A, Mitarai S. 2019.  
406 Antimicrobial susceptibility testing of Mycobacteroides (Mycobacterium) abscessus complex,  
407 Mycolicibacterium (Mycobacterium) fortuitum, and Mycobacteroides (Mycobacterium)  
408 chelonae. J Infect Chemother 25:117-123.
- 409 23. Sparks R, Khatami A. 2014. Mycobacterium fortuitum Complex Skin Infection in a Healthy  
410 Adolescent. Infect Disord Drug Targets 14:168-71.
- 411 24. Hashemian SMR, Farhadi T, Ganjparvar M. 2018. Linezolid: a review of its properties, function,  
412 and use in critical care. Drug Des Devel Ther 12:1759-1767.
- 413 25. Cavusoglu C, Soyler I, Akinci P. 2007. Activities of Linezolid against nontuberculous  
414 mycobacteria. New Microbiol 30:411-4.
- 415 26. Brown-Elliott BA, Crist CJ, Mann LB, Wilson RW, Wallace RJ, Jr. 2003. In vitro activity of  
416 linezolid against slowly growing nontuberculous Mycobacteria. Antimicrob Agents Chemother  
417 47:1736-8.
- 418 27. Prokocimer P, Bien P, Surber J, Mehra P, DeAnda C, Bulitta JB, Corey GR. 2011. Phase 2,  
419 randomized, double-blind, dose-ranging study evaluating the safety, tolerability, population  
420 pharmacokinetics, and efficacy of oral torezolid phosphate in patients with complicated skin  
421 and skin structure infections. Antimicrob Agents Chemother 55:583-92.
- 422 28. Vera-Cabrera L, Brown-Elliott BA, Wallace RJ, Jr., Ocampo-Candiani J, Welsh O, Choi SH,  
423 Molina-Torres CA. 2006. In vitro activities of the novel oxazolidinones DA-7867 and DA-7157  
424 against rapidly and slowly growing mycobacteria. Antimicrob Agents Chemother 50:4027-9.
- 425 29. Brown-Elliott BA, Wallace RJ, Jr. 2017. In Vitro Susceptibility Testing of Tedizolid against  
426 Nontuberculous Mycobacteria. J Clin Microbiol 55:1747-1754.
- 427 30. Zong Z, Jing W, Shi J, Wen S, Zhang T, Huo F, Shang Y, Liang Q, Huang H, Pang Y. 2018.  
428 Comparison of in vitro activity and MIC distributions between the novel oxazolidinone  
429 delpazolid and linezolid against multidrug-resistant and extensively drug-resistant  
430 Mycobacterium tuberculosis in China. Antimicrob Agents Chemother  
431 doi:10.1128/aac.00165-18.
- 432 31. McNeil MB, Dennison DD, Shelton CD, Parish T. 2017. In Vitro Isolation and Characterization  
433 of Oxazolidinone-Resistant Mycobacterium tuberculosis. Antimicrob Agents Chemother 61.
- 434 32. Flanagan S, Minassian SL, Prokocimer P. 2018. Pharmacokinetics of Tedizolid and  
435 Pseudoephedrine Administered Alone or in Combination in Healthy Volunteers. J Clin Med 7.
- 436 33. Choi Y, Lee SW, Kim A, Jang K, Nam H, Cho YL, Yu KS, Jang IJ, Chung JY. 2018. Safety,  
437 tolerability and pharmacokinetics of 21 day multiple oral administration of a new  
438 oxazolidinone antibiotic, LCB01-0371, in healthy male subjects. J Antimicrob Chemother  
439 73:183-190.
- 440 34. Sunwoo J, Kim YK, Choi Y, Yu KS, Nam H, Cho YL, Yoon S, Chung JY. 2018. Effect of food on the  
441 pharmacokinetic characteristics of a single oral dose of LCB01-0371, a novel oxazolidinone  
442 antibiotic. Drug Des Devel Ther 12:1707-1714.
- 443 35. Dong W, Chochua S, McGee L, Jackson D, Klugman KP, Vidal JE. 2014. Mutations within the  
444 rplD Gene of Linezolid-Nonsusceptible Streptococcus pneumoniae Strains Isolated in the  
445 United States. Antimicrob Agents Chemother 58:2459-62.

- 446 36. Yang K, Chang JY, Cui Z, Li X, Meng R, Duan L, Thongchol J, Jakana J, Huwe CM, Sacchettini JC,  
447 Zhang J. 2017. Structural insights into species-specific features of the ribosome from the  
448 human pathogen *Mycobacterium tuberculosis*. *Nucleic Acids Res* 45:10884-10894.
- 449 37. Eyal Z, Matzov D, Krupkin M, Wekselman I, Paukner S, Zimmerman E, Rozenberg H, Bashan A,  
450 Yonath A. 2015. Structural insights into species-specific features of the ribosome from the  
451 pathogen *Staphylococcus aureus*. *Proc Natl Acad Sci U S A* 112:E5805-14.
- 452 38. Ippolito JA, Kanyo ZF, Wang D, Franceschi FJ, Moore PB, Steitz TA, Duffy EM. 2008. Crystal  
453 structure of the oxazolidinone antibiotic linezolid bound to the 50S ribosomal subunit. *J Med*  
454 *Chem* 51:3353-6.
- 455 39. Beckert P, Hillemann D, Kohl TA, Kalinowski J, Richter E, Niemann S, Feuerriegel S. 2012. rplC  
456 T460C identified as a dominant mutation in linezolid-resistant *Mycobacterium tuberculosis*  
457 strains. *Antimicrob Agents Chemother* 56:2743-5.
- 458 40. Pang YA-Ohoo, Zheng H, Tan Y, Song Y, Zhao Y. 2017. In Vitro Activity of Bedaquiline against  
459 Nontuberculous *Mycobacteria* in China. LID - e02627-16 [pii] LID - 10.1128/AAC.02627-16  
460 [doi]. *Antimicrob Agents Chemother* 61.
- 461 41. Clinical and Laboratory Standards Institute.2011. Susceptibility testing of mycobacteria,  
462 nocardia, and other aerobic actinomycetes; approved standard, 2nd ed; CLSI document  
463 M24-A2, Wayne, PA.
- 464 42. Coeck N, de Jong BC, Diels M, de Rijk P, Ardizzoni E, Van Deun A, Rigouts L. 2016. Correlation  
465 of different phenotypic drug susceptibility testing methods for four fluoroquinolones in  
466 *Mycobacterium tuberculosis*. *J Antimicrob Chemother* 71:1233-40.
- 467 43. Kim SY, Jhun BW, Moon SM, Jeon K, Kwon OJ, Huh HJ, Lee NY, Shin SJ, Daley CL, Koh WJ. 2019.  
468 Genetic mutations in linezolid-resistant *Mycobacterium avium* complex and *Mycobacterium*  
469 *abscessus* clinical isolates. *Diagn Microbiol Infect Dis* 94:38-40.

470 **Table 1.MICs of LZD,TZD,SZD and DZD against the reference strains of 32 RGM species**

471 **Table 2. The MICs of LZD,TZD,SZD and DZD against clinically isolated species with less**  
472 **than 5 isolates**

473 **Table 3.The MICs of LZD and rplC, rplD and 23srRNA mutations against *M. abscessus* and**  
474 ***M. massiliense* isolates**

475 **Table 4.The MICs of LZD and rplC, rplD and 23srRNA mutations against *M. fortuitum***  
476 **isolates**

477 **Figure 1. The MIC distributions of *M. abscessus* and *M. massiliense* against LZD,TZD, SZD**  
478 **and DZD.**

479 **Figure 2.The MIC distributions of *M. fortuitum* against LZD,TZD, SZD and DZD.**

480 **Figure 3.The structure of the ribosomal 23SrRNA and rplD.**(A)The structure of LZD and its  
481 analog LZD-114. (B)The structure of rplD and Ala177Pro mutations detected in *M.massiliense*  
482 isolated highlighted in red.(C) The structure of ribosomal 23SrRNA and mutations detected in  
483 tested RGM clinical isolates were highlighted in red.

484 **Table S1. Primer sets used for target genes in this study**

485 **FigureS1. Sequence alignment *rplC* homologue proteins.** Alignment of the amino acid  
486 sequences of *M. tuberculosis*, *M.abscessus*,*M.massiliense*,*M.chelonae*, *M. fortuitum* and  
487 *M.smegmatis*. The topology of the *rplC* encoded protein of *M. tuberculosis* is shown at  
488 the top.Red boxes with white letters indicate a single, fully conserved residue. Blue frames  
489 indicate highly conserved residues.  $\beta$ -Strands are rendered as arrows.

490 **FigureS2. Sequence alignment *rplD* homologue proteins.** Alignment of the amino acid  
491 sequences of *M. tuberculosis*, *M.abscessus*,*M. massiliense*,*M.chelonae*, *M. fortuitum* and  
492 *M.smegmatis*. The topology of the *rplD* encoded protein of *M. tuberculosis* is shown at  
493 the top.Red boxes with white letters indicate a single, fully conserved residue. Blue frames  
494 indicate highly conserved residues.  $\beta$ -Strands are rendered as arrows.



Table 1. MICs of LZD,TZD,SZD and DZD against reference strains of 32 RGM species

| Strain by type  | Mycobacterium species<br>(strain)          | MIC( $\mu\text{g/ml}$ ) |       |      |       |
|-----------------|--------------------------------------------|-------------------------|-------|------|-------|
|                 |                                            | LZD                     | TZD   | SZD  | DZD   |
| RGM species     |                                            |                         |       |      |       |
| ATCC 19977      | <i>Mycobacterium abscessus</i>             | 16                      | 4     | 8    | 8     |
| ATCC 27406      | <i>Mycobacterium agri</i>                  | 0.25                    | 0.25  | 0.25 | 0.5   |
| ATCC 27280      | <i>Mycobacterium aichiense</i>             | 0.5                     | 0.5   | 2    | 1     |
| ATCC 23366      | <i>Mycobacterium aurum</i>                 | 0.25                    | 0.125 | 0.25 | 0.125 |
| ATCC 33464      | <i>Mycobacterium<br/>austroafricanum</i>   | 0.25                    | 0.25  | 2    | 0.5   |
| ATCC 14472      | <i>Mycobacterium chelonae</i>              | 8                       | 8     | 4    | 8     |
| ATCC 19627      | <i>Mycobacterium chitae</i>                | 1                       | 1     | 2    | 1     |
| ATCC 27278      | <i>Mycobacterium chubuense</i>             | 32                      | 2     | 2    | 2     |
| DSM 44829       | <i>Mycobacterium cosmeticum</i>            | 4                       | 2     | 16   | 1     |
| ATCC 19340      | <i>Mycobacterium diernhoferi</i>           | 1                       | 0.5   | 2    | 1     |
| ATCC 43910      | <i>Mycobacterium duvalii</i>               | 1                       | 0.25  | 0.5  | 0.5   |
| ATCC 35219      | <i>Mycobacterium fallax</i>                | 4                       | 2     | 8    | 1     |
| ATCC 14474      | <i>Mycobacterium flavescens</i>            | 16                      | 2     | 2    | 8     |
| ATCC 6841       | <i>Mycobacterium fortuitum</i>             | 32                      | >32   | >32  | >32   |
| ATCC 27726      | <i>Mycobacterium gadium</i>                | 0.5                     | 0.125 | 0.25 | 0.125 |
| ATCC 43909      | <i>Mycobacterium gilvum</i>                | 0.5                     | 0.25  | 0.5  | 0.5   |
| ATCC<br>BAA-955 | <i>Mycobacterium goodii</i>                | 16                      | 4     | 32   | 2     |
| DSM 44124       | <i>Mycobacterium mucogenicum</i>           | 1                       | 1     | 1    | 1     |
| ATCC 25795      | <i>Mycobacterium neoaurum</i>              | 1                       | 0.5   | 2    | 1     |
| ATCC 27023      | <i>Mycobacterium obuense</i>               | 0.5                     | 0.25  | 0.5  | 0.5   |
| ATCC 19686      | <i>Mycobacterium parafortuitum</i>         | 1                       | 0.5   | 2    | 1     |
| DSM 43271       | <i>Mycobacterium peregrinum</i>            | 2                       | 4     | 4    | 1     |
| ATCC 11758      | <i>Mycobacterium phlei</i>                 | 2                       | 4     | 8    | 16    |
| ATCC 33776      | <i>Mycobacterium porcinum</i>              | 16                      | 8     | 32   | 4     |
| ATCC 35154      | <i>Mycobacterium pulveris</i>              | 1                       | 1     | 1    | 2     |
| ATCC 27024      | <i>Mycobacterium rhodesiae</i>             | >32                     | >32   | >32  | 16    |
| ATCC 700731     | <i>Mycobacterium septicum</i>              | 16                      | 8     | 8    | 8     |
| ATCC 19420      | <i>Mycobacterium smegmatis</i>             | 2                       | 2     | 4    | 4     |
| ATCC 19527      | <i>Mycobacterium<br/>thermoresistibile</i> | 4                       | 2     | 2    | 4     |
| ATCC 27282      | <i>Mycobacterium tokaiense</i>             | 1                       | 2     | 2    | 1     |
| ATCC 23292      | <i>Mycobacterium triviale</i>              | 2                       | 2     | 2    | 2     |
| ATCC 15483      | <i>Mycobacterium vaccae</i>                | 2                       | 0.5   | 1    | 1     |

Table 2. MICs of LZD,TZD,SZD and DZD against reference strains of 6 RGM species

| Mycobacterium species<br>(strain) | Clinical isolates<br>number | MIC( $\mu$ g/ml) |     |     |     |
|-----------------------------------|-----------------------------|------------------|-----|-----|-----|
|                                   |                             | LZD              | TZD | SZD | DZD |
| RGM species                       |                             |                  |     |     |     |
| Mycobacterium chelonae            | 585                         | 32               | 8   | 16  | 8   |
| Mycobacterium chelonae            | 752                         | >32              | 16  | 8   | 16  |
| Mycobacterium chelonae            | 1354                        | 4                | 1   | 2   | 1   |
| Mycobacterium chelonae            | 1392                        | 4                | 1   | 2   | 1   |
| Mycobacterium chelonae            | 1593                        | 4                | 0.5 | 2   | 0.5 |
| Mycobacterium porcinum            | 29891                       | 4                | 2   | 4   | 1   |

Table 3. The MICs of LZD and *rplC*, *rplD* and *23srRNA* mutations against *M. abscessus* and *M. massiliense* isolates

| MIC of LZD ( $\mu\text{g/ml}$ ) | Species (NO.)              | RplC                       | RplD                                                        | 23SrRNA                 |
|---------------------------------|----------------------------|----------------------------|-------------------------------------------------------------|-------------------------|
| 0.25                            | <i>M. abscessus</i> (0)    | —                          | —                                                           | —                       |
|                                 | <i>M. massiliense</i> (1)  | Leu86Leu(1)                | Gly75Gly(1)                                                 | WT                      |
| 1                               | <i>M. abscessus</i> (1)    | WT                         | WT                                                          | WT                      |
|                                 | <i>M. massiliense</i> (0)  | —                          | —                                                           | —                       |
| 2                               | <i>M. abscessus</i> (4)    | WT                         | WT                                                          | G1914A (1)<br>T2650C(1) |
|                                 | <i>M. massiliense</i> (4)  | Leu86Leu(2)                | Gly75Gly(2)<br>Ala177Pro(2)<br>Val192Val(2)                 | WT                      |
| 4                               | <i>M. abscessus</i> (14)   | WT                         | Phe23Phe(2)                                                 | T2650C(1)               |
|                                 | <i>M. massiliense</i> (8)  | Leu86Leu(5)                | Gly75Gly(5)<br>Ala177Pro (3)<br>Val192Val(3)                | G2582C(1)<br>-2625AC(1) |
| 8                               | <i>M. abscessus</i> (17)   | WT                         | Phe23Phe(3)<br>Gly111Gly(1)                                 | WT                      |
|                                 | <i>M. massiliense</i> (10) | Leu86Leu(4)<br>Ala92Ala(2) | Ile29Ile(1)<br>Gly75Gly(3)<br>Ala177Pro (4)<br>Val192Val(6) | A2271G(1)               |
| 16                              | <i>M. abscessus</i> (13)   | WT                         | Phe23Phe(3)                                                 | WT                      |
|                                 | <i>M. massiliense</i> (5)  | Leu86Leu(2)                | Gly75Gly(2)<br>Ala177Pro (3)<br>Val192Val(3)                | WT                      |
| >16                             | <i>M. abscessus</i> (0)    | —                          | —                                                           | —                       |
|                                 | <i>M. massiliense</i> (7)  | Leu86Leu(1)<br>Ala92Ala(6) | Gly75Gly(1)<br>Val192Val(5)                                 | WT                      |

Table 4. The MICs of LZD and *rplC*, *rplD* and *23srRNA* mutations against *M. fortuitum* isolates

| MIC of LZD ( $\mu\text{g/ml}$ ) | Species (NO.) | RplC | RplD                                                                                                               | 23SrRNA   |
|---------------------------------|---------------|------|--------------------------------------------------------------------------------------------------------------------|-----------|
| 4                               | 1             | -    | Ala146Gly+ Thr147Ser +<br>Val156Ile+ Ala161Thr+<br>Lys167Arg+ Ser207Ala+<br>Glu212Gly+ Val213Ala+<br>Ala215Val (1) |           |
| 8                               | 2             |      | Ala146Gly+ Thr147Ser +<br>Val156Ile+ Ala161Thr+<br>Lys167Arg+ Ser207Ala+<br>Glu212Gly+ Val213Ala+<br>Ala215Val (1) |           |
|                                 |               |      | WT                                                                                                                 | C1944T(1) |
| 16                              | 9             |      | Ala146Gly+ Thr147Ser +<br>Val156Ile+ Ala161Thr+<br>Lys167Arg+ Ser207Ala+<br>Glu212Gly+ Val213Ala+<br>Ala215Val (8) |           |
| 32                              | 7             |      | Ala161Thr+ Lys167Arg+<br>Ser207Ala+ Glu212Gly+<br>Val213Ala+ Ala215Val(1)                                          | A2090T(1) |
|                                 |               |      | Ala146Gly+ Thr147Ser +<br>Val156Ile+ Ala161Thr+<br>Lys167Arg+ Ser207Ala+<br>Glu212Gly+ Val213Ala+<br>Ala215Val (5) |           |
| >32                             | 6             |      | Ala146Gly+ Thr147Ser +<br>Val156Ile+ Ala161Thr+<br>Lys167Arg+ Ser207Ala+<br>Glu212Gly+ Val213Ala+<br>Ala215Val (6) |           |

**Figure 1**

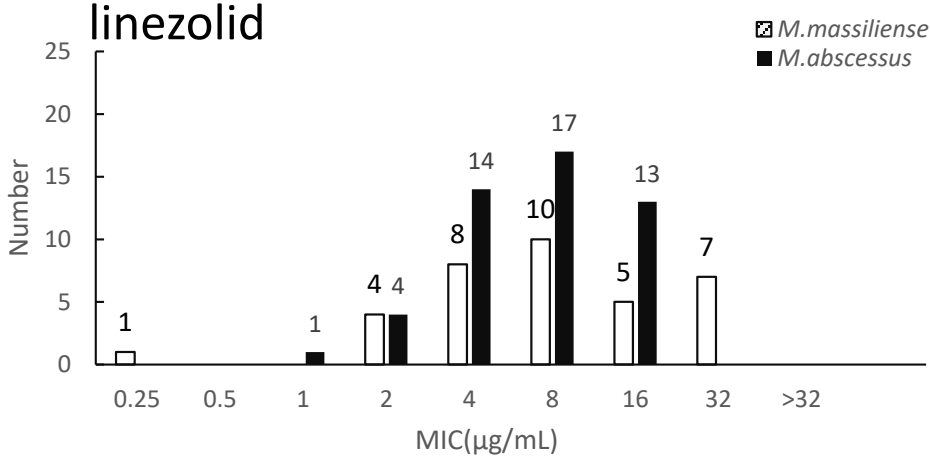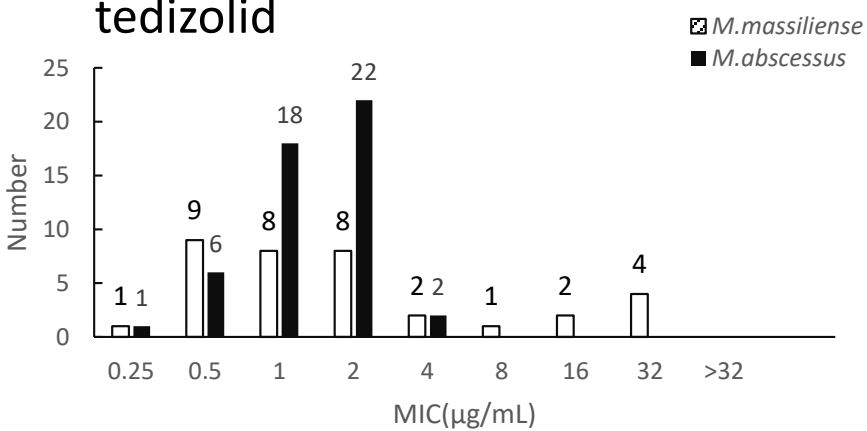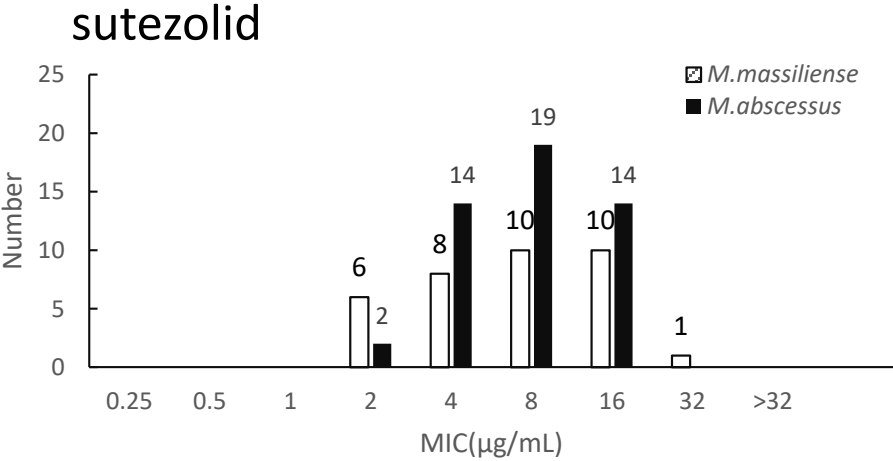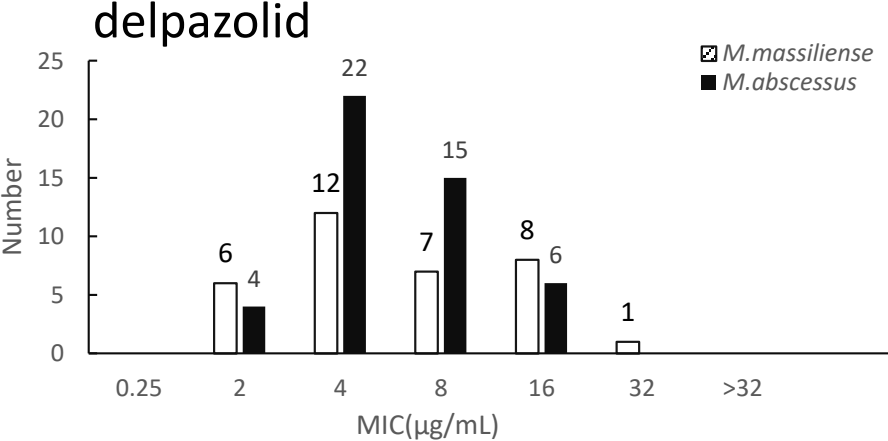

**Figure 2**

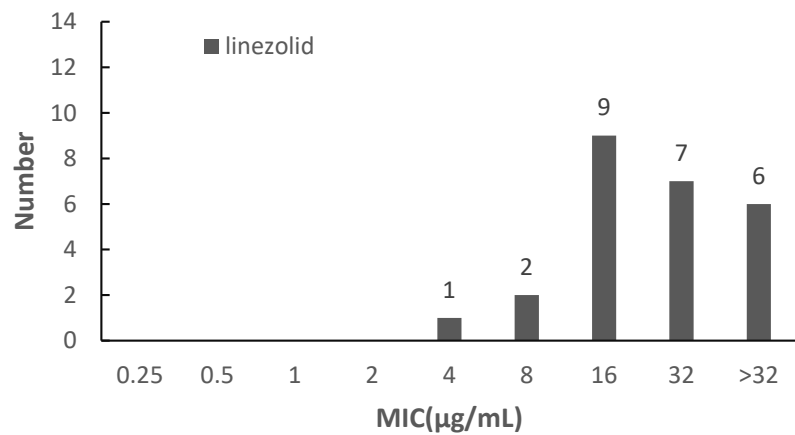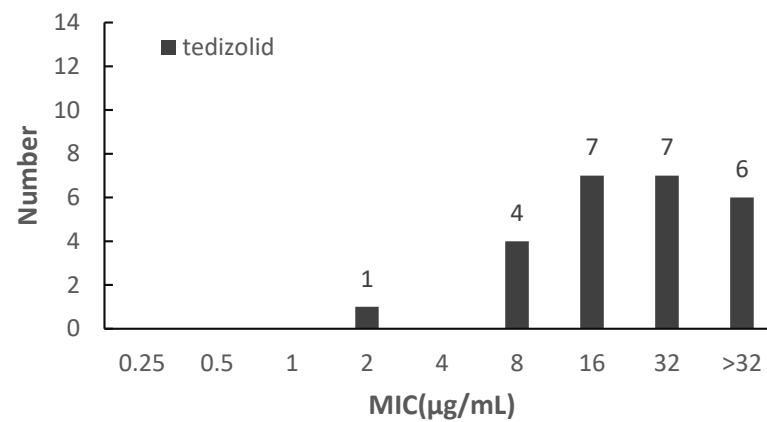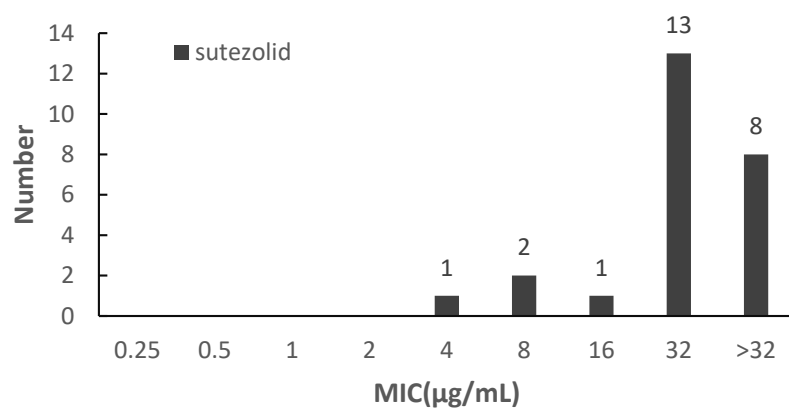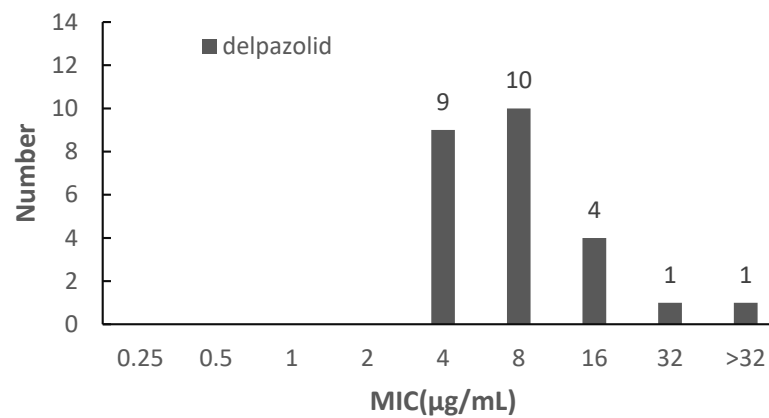

**Figure.3**

**A**

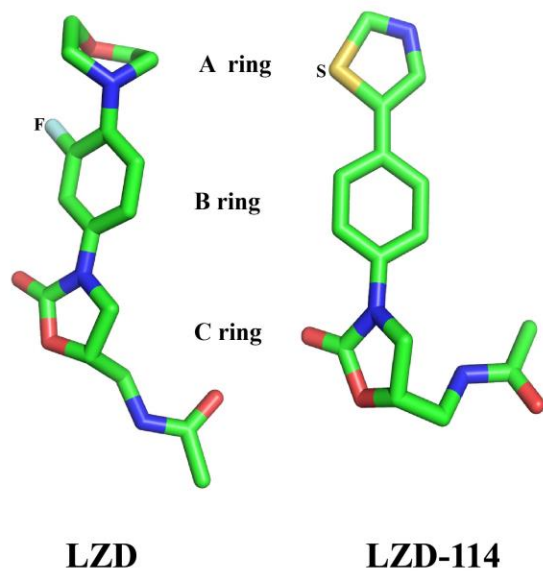

**C**

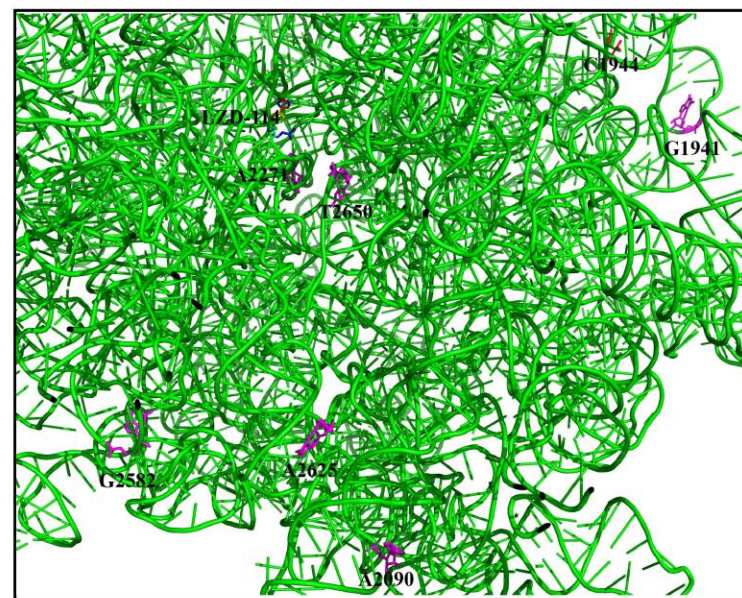

**B**

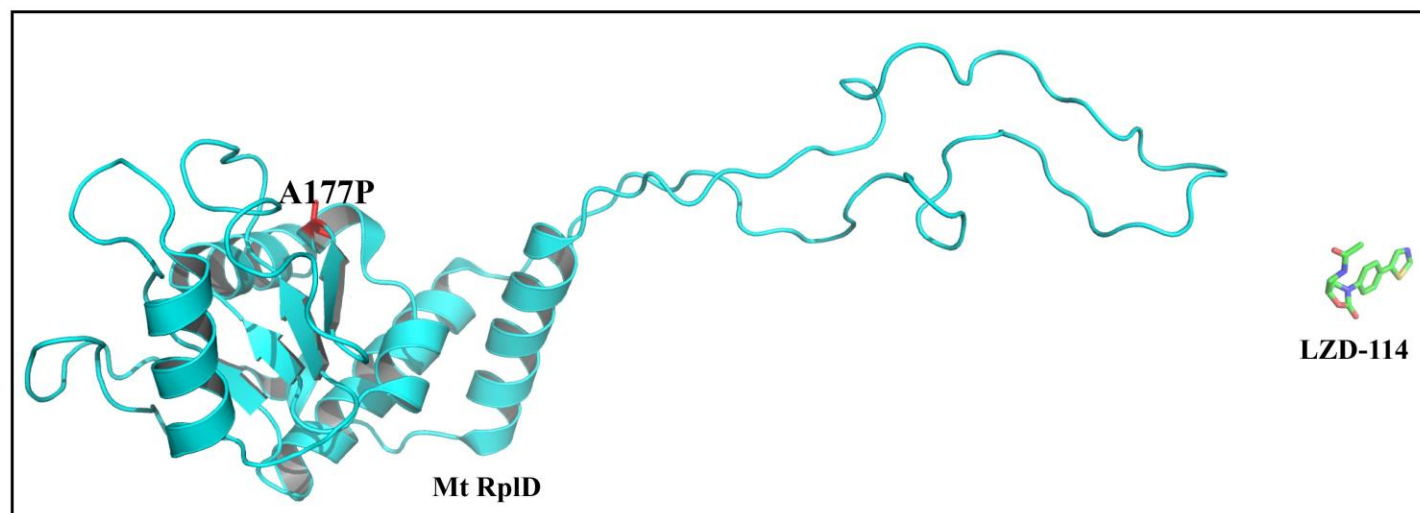

Source: https://www.biorxiv.org/content/10.1101/2020.06.25.172742v1.full.pdf
